# Supplementary material for: Increase in germline methyltransferases governing the methylation of histone H3K9 is associated with transgenerational nanoplastic toxicity in Caenorhabditis elegans
Source: Royal Society of Chemistry journal article supplement (doi:10.1039/d1en00835h), 2021-11-25
Supplement: d1en00835h1.pdf [file d1en00835h1.pdf]

**Supporting Information:**

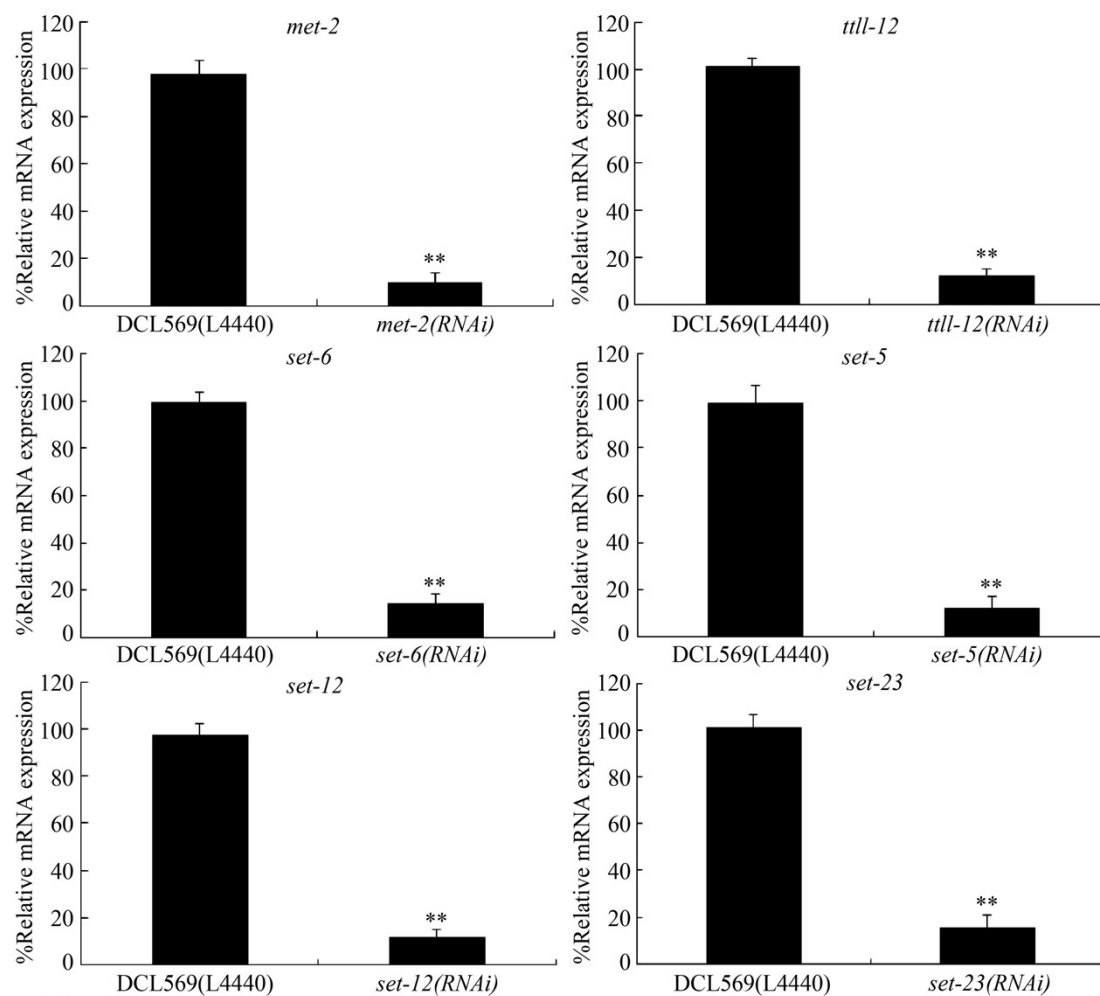

**Figure S1.** Efficiency of germline RNAi knockdown of *met-2*, *tll-12*, *set-6*, *set-5*, *set-12*, and *set-23* in DCL569 nematodes. L4440, empty vector. Bars represent means  $\pm$  SD. \*\* $P < 0.01$  vs DCL569(L4440).

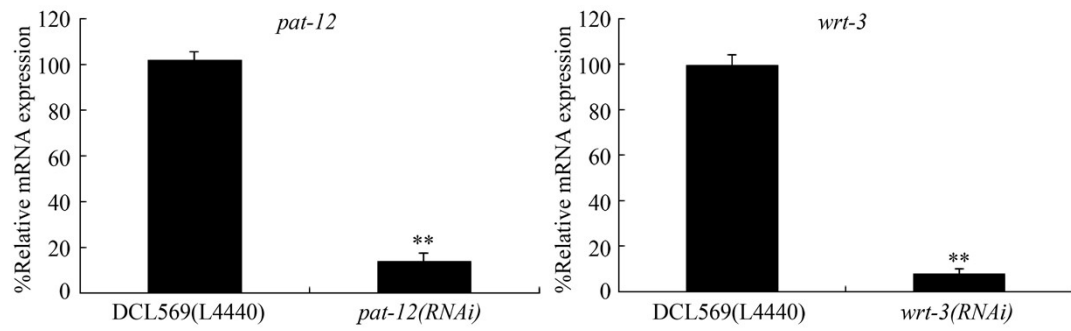

**Figure S2.** Efficiency of germline RNAi knockdown of *pat-12* and *wrt-3* in DCL569 nematodes. L4440, empty vector. Bars represent means  $\pm$  SD. \*\* $P < 0.01$  vs DCL569(L4440).

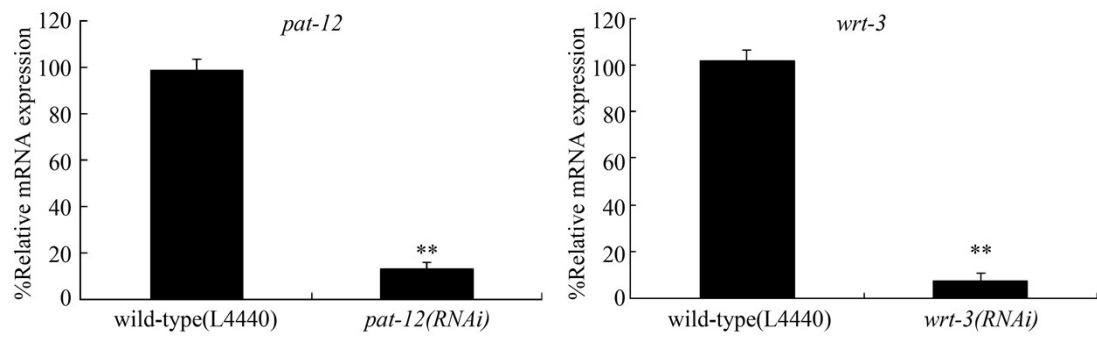

**Figure S3.** Efficiency of RNAi knockdown of *pat-12* and *wrt-3* in wild-type nematodes. L4440, empty vector. Bars represent means  $\pm$  SD. \*\* $P < 0.01$  vs wild-type(L4440).

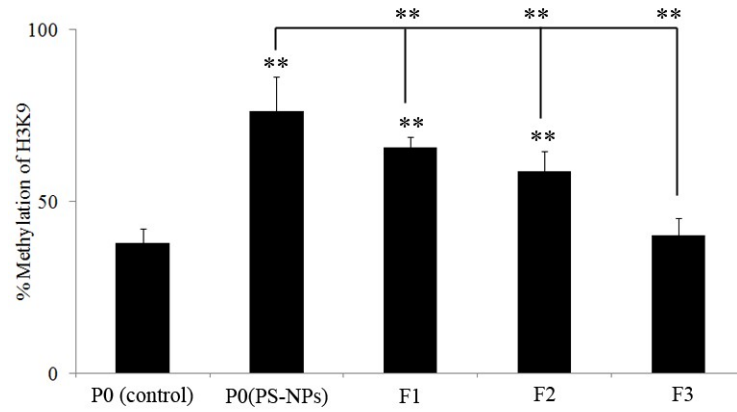

**Figure S4.** Methylation status of histone H3K9 in P0, F1, F2, and F3 generation after exposed to PS-NPs (1  $\mu\text{g/L}$ ). PS-NPs, polystyrene nanoparticles. Bars represent means  $\pm$  SD. **\*\*** $P < 0.01$  vs P0(control) (if not specially indicated).

**Table S1.** Information for *C. elegans* strains

| Strains | Genotype                                                                                                                      | Description                                                                    |
|---------|-------------------------------------------------------------------------------------------------------------------------------|--------------------------------------------------------------------------------|
| N2      |                                                                                                                               | Wild-type                                                                      |
| DCL569  | <i>mkcSi13[sun-1p::rde-1::sun-1</i><br><i>3'UTR + unc-119(+)]</i> ; <i>rde-</i><br><i>1(mkc36)</i><br><i>Is(Pmex-5-met-2)</i> | Germline RNAi knockdown tool<br><br>Nematodes overexpressing germline<br>MET-2 |

## References:

- Zou, L., Wu, D., Zang, X., Wang, Z., Wu, Z., Chen, D., 2019. Construction of a germline-specific RNAi tool in *C. elegans*. *Sci. Rep.* 9, 2354.
- Wang, S.-T., Zhang, R.-J., Wang, D.-Y., 2021. Induction of protective response to polystyrene nanoparticles associated with methylation regulation in *Caenorhabditis elegans*. *Chemosphere* 271, 129589.

**Table S2.** Primer information for qRT-PCR

| Gene           | Forward primer (5'-3') | Reverse primer (5'-3')    |
|----------------|------------------------|---------------------------|
| <i>mes-2</i>   | CAGGAGAAGGCCGAAGCGTAA  | GCACACTCCGTTTTTCACGAC     |
| <i>mes-4</i>   | ATGCGTGATTTGCCACGAAG   | GCCGATTGCTTGTGATGGTC      |
| <i>met-1</i>   | ACGCAAAGTGGTATTGCCTAA  | GCGTACTCGATCTCCGCTTC      |
| <i>met-2</i>   | ATCAGCGATTCACCGGTTGT   | TGCTGATGCAGGTGATGTGA      |
| <i>blmp-1</i>  | CATCAATGGCTGGAGGTGGT   | CTTGCGTAGTCCCTGCTGAA      |
| <i>set-1</i>   | TGTTGTCGAATACAGAGGTGTT | CTCCTTGTGCGATTTGACGC      |
| <i>set-3</i>   | TACCACGTGGATCGAAGGAAC  | TTTGACGACGAGCTCCGAGA      |
| <i>set-4</i>   | CGCTGTTGACTCTATGGCT    | GGATCGTGAGCGGAGTTCAT      |
| <i>set-14</i>  | ATGAATCTTCCCCAGACGC    | TCGAGTCGTTGCAACTTCA       |
| <i>ttll-12</i> | GGCTGCTTGTGCAATGAGAG   | CTTGGGAACAACAATGGGCG      |
| <i>set-17</i>  | GAAATCAGCGACGGGGCATA   | TAATCCGGCATTCCGGCAACT     |
| <i>set-27</i>  | CTGAGTAAGCAGCCACCGTC   | AAGTGACAGCCCAGCAGTTT      |
| <i>set-29</i>  | TCTTTCCCGAACTGAGCCAC   | GCGGAATGAGCACTTTAGCG      |
| <i>set-5</i>   | AGGAGCTGCTTCCGACACTA   | CAGTCCCTCGAGCATCCAAA      |
| <i>set-6</i>   | TTACACCCGCCAATATGCGA   | TCAACCCGAACCTCCTCAAC      |
| <i>set-9</i>   | AAGCGTAAAGAAGCACGACG   | CGTTTTCTGGAATCATTGGGCG    |
| <i>set-12</i>  | ACCAAGGCCGAGCACAATAA   | CTACATGCTGCTTCCCCACA      |
| <i>set-13</i>  | ACCAAAGGCCAGTAATCCG    | TATCGCTCCCAAAGTGCTCG      |
| <i>set-21</i>  | CATTTGCTGGCAGAACAGGG   | GAAGCACGGGCATTTTTCGT      |
| <i>set-24</i>  | CGTCCTCGTCAACTGTCCAA   | TCAGTTGCGTCAGGAGCATT      |
| <i>set-26</i>  | CGAGAGCAACAACAGCAGAT   | GTCTTGGCGCTCTGCTACTA      |
| <i>set-28</i>  | CACTCGATGGATCGTGGGAA   | CTCGTGGCACAAGTGTTTCG      |
| <i>set-31</i>  | TCTCCACCCAAAATACCGGC   | GTCACTAAGCGCGGTATCCA      |
| <i>set-32</i>  | TCGAACTGGAGGCGTCTTTT   | CAAAACTTCCGCACTCGCAT      |
| <i>set-2</i>   | CGAAGAACCTGCACAAGTCG   | ACGATTGATTGTTGTAGAGAGTCAT |
| <i>set-16</i>  | CCGAGCGCGGTATGTTCTAT   | TGGCTGGAATTCTGGCTCTG      |
| <i>set-23</i>  | CGAGTTGTGCAATGTGGACC   | TTCACGGGTTTTCCACCGAA      |

|                |                       |                        |
|----------------|-----------------------|------------------------|
| <i>wdr-5.1</i> | TGCCCAAACCTCCCAATCCAA | ATGATCCGGAGACAACGAGC   |
| <i>ash-2</i>   | AGTTAAACAGCAACGGCGTG  | TGGCTCACGGTTTTCCCTTT   |
| <i>rbbp-5</i>  | TTGGCTGTACTGATGGCAGG  | TGCTCTACCGTTGGCTGTTT   |
| <i>his-24</i>  | TTCCAAGCAGGCAATCCTCA  | CTTTGGGCTCTTGGCCTTCT   |
| <i>tba-1</i>   | TCAACACTGCCATCGCCGCC  | TCCAAGCGAGACCAGGCTTCAG |

---
